# Supplementary material
Source: publisher figshare collection journal article supplement (https://acs.figshare.com/ndownloader/files/4627747)
Supplement: Supplementary file 1 [file 4627747]

# Polycaprolactone-POSS

## Chemical/Physical Double Networks

### SUPPLEMENTARY INFORMATION

*Kyung Min Lee,<sup>1</sup> Pamela T. Knight,<sup>1,2</sup> Taekwoong Chung,<sup>1,2</sup> Patrick T. Mather<sup>2,3\*</sup>*

<sup>1</sup>Department of Macromolecular Science and Engineering, Case Western Reserve University, 2100 Adelbert Road, Cleveland, OH 44106 <sup>2</sup>Syracuse Biomaterials Institute, <sup>3</sup>Department of Biomedical and Chemical Engineering, Syracuse University, Syracuse, NY 13244

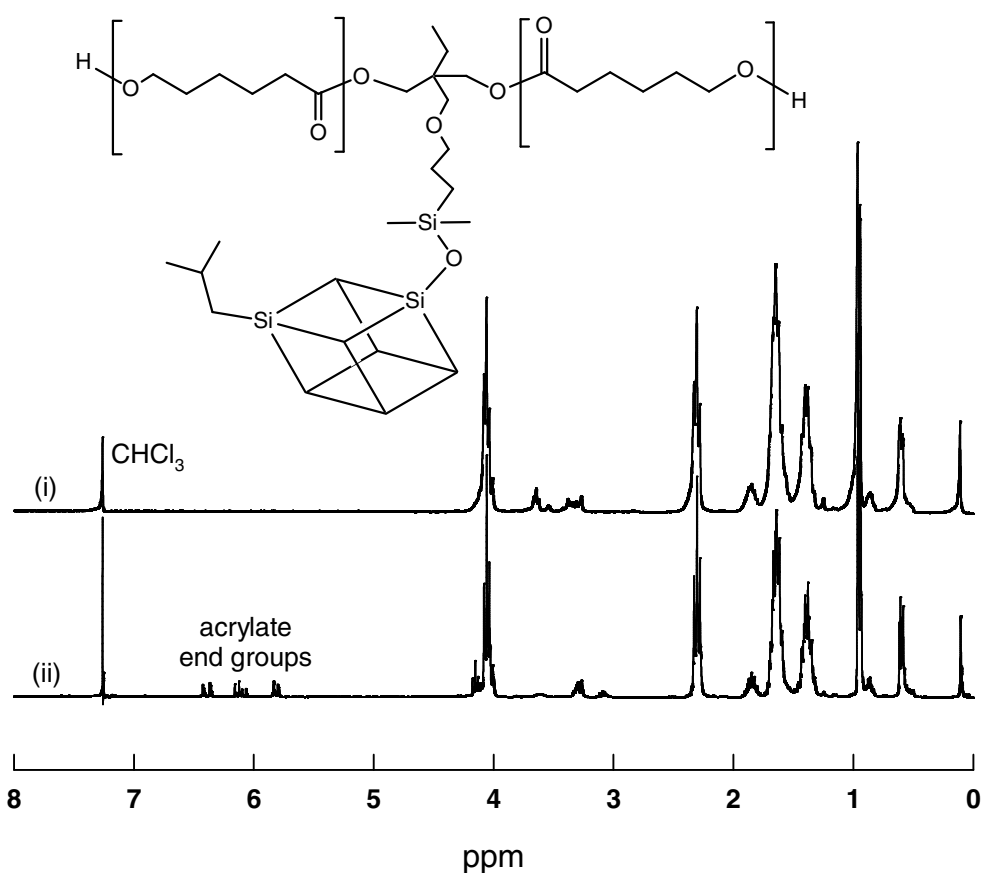

**Figure S1.** <sup>1</sup>H NMR spectra for (i) P-CL2.5 diol and (ii) the acrylate end-capped P-CL2.5-mac. Important peaks are indicated on the diol molecular structure.

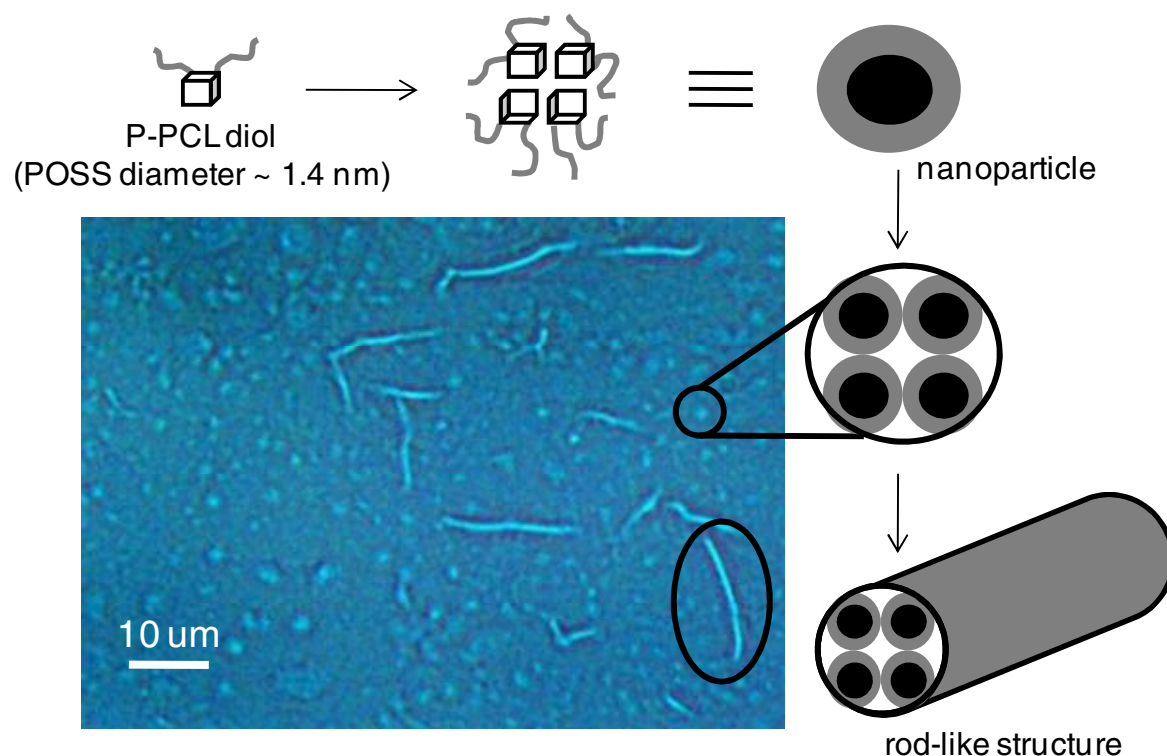

**Figure S2.** Optical micrograph of P-CL2 at room temperature (cast from a dilute solution) showing spherical and rod-like aggregations of POSS along with a proposed mechanism for the self-assembly of the POSS-PCL diols.

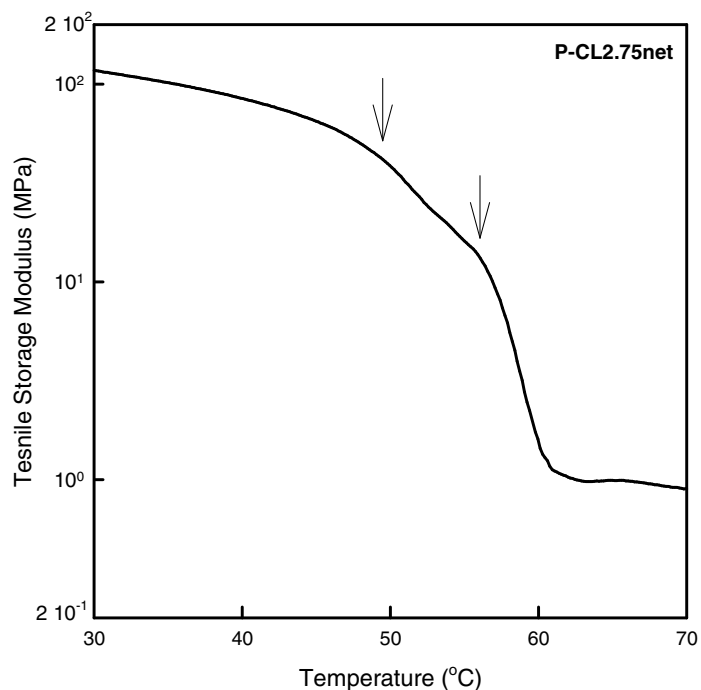

**Figure S3.** Temperature dependence of  $E'$  for P-CL2.75net on an expanded temperature scale, revealing a two-step melting behavior.
